# Supplementary material
Source: PubMed Central journal article supplement (PMC3187184)
Supplement: supp_ASN.2011010026_SFig.1.pdf [file supp_ASN.2011010026_SFig.1.pdf]

**Supplemental data**

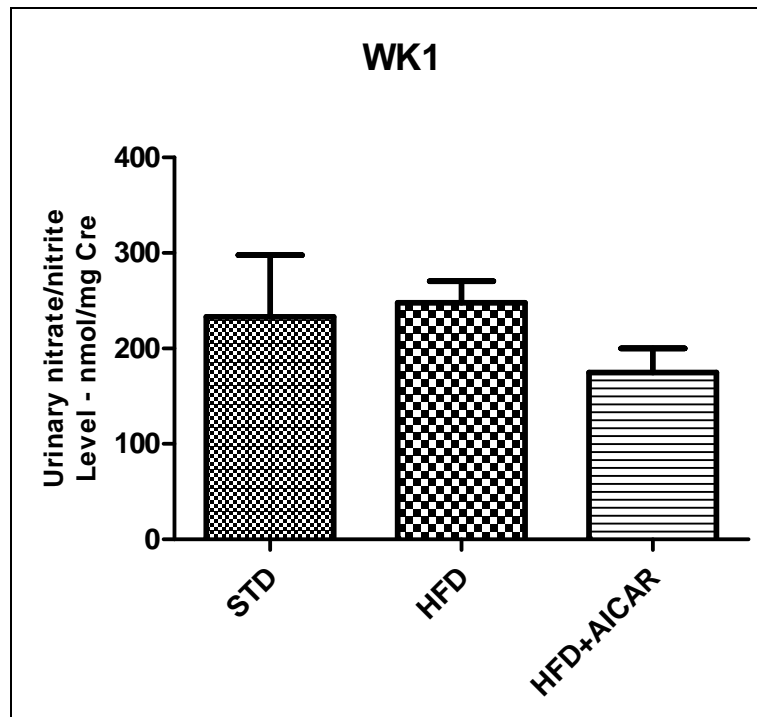

Supplemental Figure 1. Urine nitrate/nitrite – creatinine ratio at week 1 on diet. Values are means  $\pm$  SEM. N=6 in each group. Statistical analyses were performed by one-way ANOVA followed by Newman-Keuls NS
